# Supplementary material for: Increasing Attendance at Scheduled Appointments for Group Classes at a Diabetes Education Center
Source: Oxford University Press journal article supplement (doi:10.2337/cd18-0100), 2019-06-03
Supplement: cd180100supplementarymaterials.pdf [file cd180100supplementarymaterials.pdf]

**FIGURE S1**

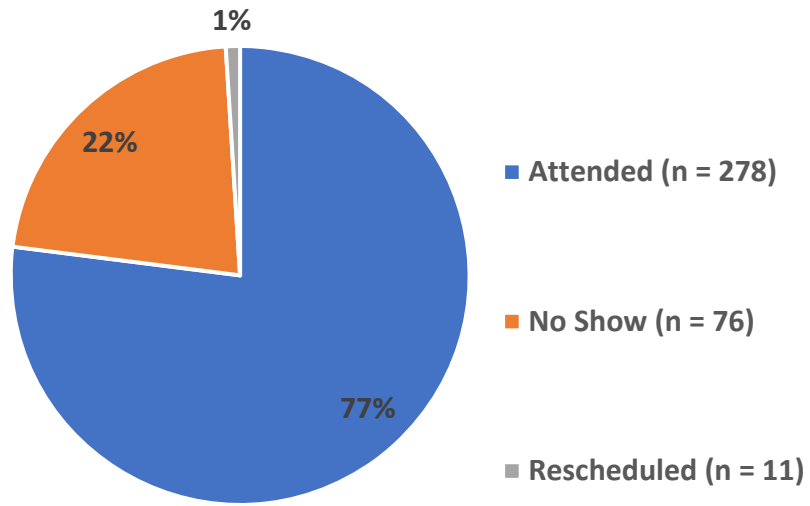

**FIGURE S1.** Pre-intervention attendance outcomes.

**FIGURE S2**

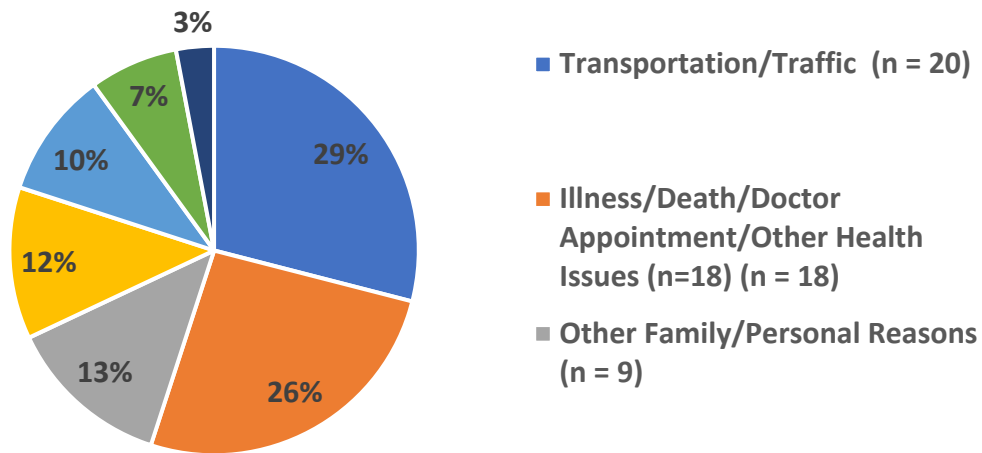

**FIGURE S2.** Reasons for no-shows. A substantial percentage of no-shows were attributable to transportation issues. DEC, Diabetes Education Center.

**FIGURE S3**

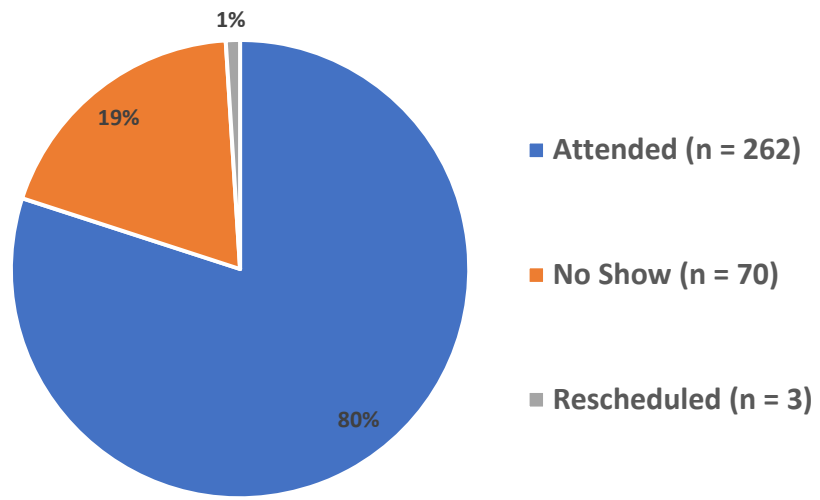

**FIGURE S3.** Post-intervention attendance outcomes.
